# Cecropins contribute to *Drosophila* host defense against a subset of fungal and Gram-negative bacterial infection

Alexia L. Carboni,<sup>1,\*</sup> Mark A. Hanson ,<sup>1</sup> Scott A. Lindsay,<sup>2</sup> Steven A. Wasserman,<sup>2</sup> and Bruno Lemaitre  <sup>1,\*</sup>

<sup>1</sup>Global Health Institute, School of Life Science, École Polytechnique Fédérale de Lausanne (EPFL), 1015 Lausanne, Switzerland and

<sup>2</sup>Division of Biological Sciences, University of California San Diego (UCSD), La Jolla, CA 92093, USA

\*Corresponding author: EPFL SV/GHI/UPLM, SV 3838, Station n° 19, CH-1015 Lausanne, Switzerland. Email: alexia.carboni@epfl.ch (A.L.C.); bruno.lemaitre@epfl.ch (B.L.)

## Abstract

Cecropins are small helical secreted peptides with antimicrobial activity that are widely distributed among insects. Genes encoding Cecropins are strongly induced upon infection, pointing to their role in host defense. In *Drosophila*, four cecropin genes clustered in the genome (*CecA1*, *CecA2*, *CecB*, and *CecC*) are expressed upon infection downstream of the Toll and Imd pathways. In this study, we generated a short deletion  $\Delta\text{Cec}^{\text{A-C}}$  removing the whole cecropin locus. Using the  $\Delta\text{Cec}^{\text{A-C}}$  deficiency alone or in combination with other antimicrobial peptide (AMP) mutations, we addressed the function of Cecropins in the systemic immune response.  $\Delta\text{Cec}^{\text{A-C}}$  flies were viable and resisted challenge with various microbes as wild-type. However, removing  $\Delta\text{Cec}^{\text{A-C}}$  in flies already lacking 10 other AMP genes revealed a role for Cecropins in defense against Gram-negative bacteria and fungi. Measurements of pathogen loads confirm that Cecropins contribute to the control of certain Gram-negative bacteria, notably *Enterobacter cloacae* and *Providencia heimbachae*. Collectively, our work provides the first genetic demonstration of a role for Cecropins in insect host defense and confirms their *in vivo* activity primarily against Gram-negative bacteria and fungi. Generation of a fly line ( $\Delta\text{AMP14}$ ) that lacks 14 immune inducible AMPs provides a powerful tool to address the function of these immune effectors in host–pathogen interactions and beyond.

**Keywords:** *Drosophila melanogaster*; innate immunity; antimicrobial peptides; resistance; CRISPR/Cas9; immune effectors; humoral immunity; Cecropin

## Introduction

In the late 1970s when immunologists were characterizing the antibody immune response of mammals, pioneering studies revealed that insects could resist infection by fearsome human pathogens despite lacking an adaptive immune system. Eventually a landmark discovery by Hans Boman *et al.* showed that insects produced antimicrobial peptides (AMPs) following infection (Steiner *et al.* 1981), invigorating interest in innate immunity (Ganz *et al.* 1985; Lemaitre 2004). These AMPs differed from other previously identified immune effectors in their small size, cationic charge, and amphipathic structure, allowing a direct disruption of the negatively charged membrane of microbes. In contrast to another class of well-known immune effectors, the lysozymes, AMPs lack enzymatic activity and require concentrations into the micromolar range to achieve their microbicidal effects (Imler and Bulet 2005; Seo *et al.* 2012; Hanson and Lemaitre 2020). Research has now shown that AMPs are common across the tree of life, with similar molecules contributing to host defense in both plants and animals (Broekaert *et al.* 1995). While they contribute to local defense in barrier epithelia of vertebrates, insect AMPs are most famous for being secreted upon systemic infection from the fat body into the hemolymph, where they

reach potent concentrations (Bulet *et al.* 1999). The characterization of a plethora of AMPs with diverse modes of action has enriched our understanding of these immune effectors. However, the functional study of AMPs was limited until recently due to technical challenges in mutating the small AMP genes using traditional genetic approaches. This challenge has now been overcome with the advent of CRISPR/Cas9 technology.

Cecropins were the first inducible AMPs to be isolated, found in the hemolymph of infected pupae of the moth *Hyalophora cecropia* (Lepidoptera) (Hultmark *et al.* 1980; Steiner *et al.* 1981). The helix-form of Cecropins is thought to promote their interaction with negatively charged bacterial membranes, contributing to pore formation and membrane destabilization, and resulting in the lysis of bacteria (Steiner *et al.* 1988). *In vitro* studies have shown that Cecropins have high efficacy against a large panel of Gram-negative bacteria at concentrations below the levels induced in insects upon infection (25–50  $\mu\text{M}$ ) (Samakovlis *et al.* 1990), as well as against some filamentous fungi (Steiner *et al.* 1981; DeLucca *et al.* 1997; Ekengren and Hultmark 1999; Ouyang *et al.* 2015). Heterologous expression of Cecropin in transgenic rice has also been shown to confer resistance to the rice blast fungus

*Magnaporthe oryzae* (Coca et al. 2004), and studies have reported an activity of Cecropins against tumor cells, bacterial biofilms, and viruses (Chiou et al. 2002; Suttman et al. 2008; Deslouches and Di 2017; Kalsy et al. 2020).

AMP regulation and function has been extensively studied in the model insect *Drosophila melanogaster*. The *Drosophila* genome encodes four cecropin genes (*CecA1* and *A2*, *CecB* and *CecC*) and two pseudogenes (*Cec-Ψ1* and *Cec-Ψ2*) that are clustered at position 99E2 at the tip of the right arm of the third chromosome (Kylsten et al. 1990; Samakovlis et al. 1990; Sackton et al. 2007). The cecropin locus is adjacent to another gene named *Andropin*, which encodes a related antibacterial peptide expressed in the ejaculatory duct (Samakovlis et al. 1991). *CecA1* and *CecA2* are identical at the protein level, differing only by a few silent mutations at the nucleotide level, suggesting that they emerged from a recent duplication. The four *Drosophila* cecropin genes are strongly induced in the fat body and hemocytes upon systemic infection. *Cecropin* genes are regulated by the *Imd* pathway, but also receive a considerable input from the *Toll* pathway upon systemic infection (De Gregorio et al. 2002). Functional studies analyzing the role of Cecropins *in vivo* are scarce. Overexpression of *CecA* in an otherwise *Imd*, *Toll* immune-deficient background failed to detect a clear protective effect of *CecA* against a battery of pathogens (Tzou et al. 2002). Other studies using overexpression approaches have pointed to a role of *CecA* in the regulation of the gut microbiota (Ryu et al. 2008). Transgenic mosquitoes overexpressing both Cecropin and *Defensin* under the control of the vitellogenin promoter displayed an increased resistance to *Pseudomonas aeruginosa* infection, indicating that these AMPs could act cooperatively against this pathogenic bacterium (Kokoza et al. 2010).

We have previously generated fly mutants deleting 10 *Drosophila* AMP genes including: *Defensin*, two *Diptericins* (*DptA* and *B*), *Drosocin*, four *Attacins* (*AttA*, *B*, *C*, and *D*), *Metchnikowin*, and *Drosomycin* (Hanson et al. 2019a). This study revealed that AMPs play an important role in defense against Gram-negative bacteria and also somewhat in defense against fungi. In contrast, another family of host defense peptides with no overt antimicrobial activity *in vitro*, the bomanins, plays a major role in the elimination of Gram-positive bacteria and fungi (Clemmons et al. 2015; Lindsay et al. 2018). Importantly, Hanson et al. (2019a) revealed evidence for synergy and additivity, but also remarkable specificity in the action of AMPs against certain pathogens. However, this study did not address the function of the four Cecropins due to a failure to generate a proper cecropin locus deletion. In the present study, we have generated fly lines carrying a small deletion that removes the four immune cecropin genes, and by using flies carrying this deletion alone or in combination with other AMP mutations, we address the role of Cecropins in the systemic immune response for the first time (Supplementary Table 1).

## Materials and methods

### Fly stocks and genetics

The  $w^{1118}$  *DrosDel* isogenic (iso  $w^{1118}$ ) wild-type was used as the genetic background for mutant isogenization, as described by Ferreira et al. (2014). The  $\Delta Cec^{A-C}$  mutation was generated using CRISPR with two gRNAs and a homology directed repair vector by cloning 5' and 3' region-homologous arms into the pHD-DsRed vector, and consequently  $\Delta Cec^{A-C}$  flies express DsRed in their eyes, ocelli, and abdomen. The  $\Delta Cec^{A-C}$  mutation was generated by Cas9 mediated injection into the iso *Mtk<sup>R1</sup>*, *Drs<sup>R1</sup>* background. Following this, two rounds of backcrossing were performed to replace the first and second chromosome with the iso *DrosDel* first

and second chromosome, and to recombine the  $\Delta Cec^{A-C}$  mutation away from other mutations. The resulting stock is here called iso  $\Delta Cec^{A-C}$ . Afterwards, the  $\Delta Cec^{A-C}$  mutation was recombined independently with *Drs<sup>R1</sup>* and *AttD<sup>SK1</sup>* on chromosome 3, and introgressed alongside the other AMP mutations on chromosome 2 to generate  $\Delta AMP14$  flies lacking the 14 classical AMP genes from the *Defensin*, *Drosocin*, *Attacin*, *Diptericin*, *Metchnikowin*, *Drosomycin*, and *Cecropin* gene families. The iso  $\Delta AMP10$ , iso *Bom<sup>AS5C</sup>* and iso *Relish<sup>E20</sup>* flies are the same as used in Hanson et al. (2019a); however, we removed the aberrant cecropin locus (*Cec<sup>SK6</sup>*) detected in the  $\Delta AMP10$  line to avoid any potential effects this locus could have on Cecropin-mediated resistance to infection [see Hanson et al. (2019b) correction notice].

### Microbial culture conditions

Bacteria were grown overnight on a shaking plate at 200 RPM in their respective growth media and at their optimal temperature conditions. They were then pelleted by centrifugation (4000 RPM) at 4°C. The bacterial pellets were diluted to the desired optical density at 600 nm (*OD<sub>600</sub>*).

*Pectobacterium carotovorum carotovorum* 15 (Ecc15) and *Micrococcus luteus* were grown in LB media at 29°C. *Escherichia coli* strain 1106, *Providencia burhodogranariae*, *Providencia rettgeri*, and *Providencia heimbachae* were grown in LB media at 37°C. *Enterococcus faecalis*, *Listeria monocytogenes*, and *Enterobacter cloacae* were cultured in BHI media at 37°C. *Streptococcus pneumoniae* was grown as described by Krejčová et al. (2019). *Candida albicans* strain ATCC 2001 was cultured in YPG media at 37°C. *Aspergillus fumigatus* was grown at 37°C on Malt Agar; spores were collected in sterile PBS, pelleted by centrifugation and resuspended at the desired OD. *Beauveria bassiana* strain R444 and *Metharizium rileyi* strain PHP1705 commercial spores were produced by Andermatt Biocontrol, product: BB-PROTEC and Nomu-PROTEC, respectively.

### Infection experiments and survival

Systemic infections with *P. carotovorum carotovorum* 15 (Ecc15) (Basset et al. 2000), *M. luteus*, *E. coli* strain 1106, *P. burhodogranariae*, *P. rettgeri*, *P. heimbachae* (Galac and Lazzaro 2011), *E. faecalis*, *L. monocytogenes*, *E. cloacae*, and *C. albicans* were performed as follows: 3- to 5-day-old adult females were pricked in the thorax with a 100  $\mu$ m thick needle dipped into a concentrated pellet of bacteria at a desired *OD<sub>600</sub>*. Infected flies were then maintained at 25°C or 29°C for survivals. Systemic infection with *S. pneumoniae* (Krejčová et al. 2019) or *M. rileyi* was performed by injecting 50 nl of a concentrated pellet of bacteria or suspension of fungal spores using a nanoinjector and glass capillary needles.

Natural infections with *B. bassiana* were performed by shaking anesthetized flies in a vial with 200 mg of spores. Flies were flipped into fresh vials 1 day after fungal inoculation. Three independent experiments for survivals to infection were performed with 20 flies per vial(s) on standard fly medium without yeast. Survival was scored daily.

### Bacterial load of flies

Flies were infected (systemic infection) with bacteria at the desired *OD<sub>600</sub>*. At the indicated time postinfection, flies were anesthetized using CO<sub>2</sub>, surface sterilized by washing briefly in 70% EtOH, and blotted. Pools of five flies were transferred in 200  $\mu$ l of sterile PBS and macerated using a pestle. The homogenates were centrifuged at 8000 RPM for 3 min. The supernatants were serially diluted and 7  $\mu$ l droplets were inoculated on LB agar overnight at

29°C. Colony-forming units (CFUs) were manually counted the following day.

### Gene expression levels by qRT-PCR

Flies that either were unchallenged or were infected systemically by pricking in the thorax with a needle dipped in a pellet of *Ecc15* or *M. luteus* ( $OD_{600} = 200$ ) were frozen at  $-20^{\circ}\text{C}$  6 h or 12 h postinfection, respectively. Three independent experiments (independent day, flies, and bacterial pellet) were performed for each infection with two or three technical repeats according to the number of flies available. Gene expression measurements were then performed by RT-qPCR as previously described (Hanson et al. 2019a). Briefly, five whole flies were homogenized and their RNA was extracted using TRIzol reagent and resuspended in RNase-free water. Reverse transcription was carried out using PrimeScript RT (TAKARA) with random hexamers and oligo dTs. Quantitative PCRs were performed on a LightCycler 480 (Roche) using PowerUp SYBR Green Master Mix.

### Cecropin A injection

Commercially available Cecropin from *H. cecropia* (Sigma-Aldrich) was diluted in PBS (1.37 M NaCl, 0.027 M KCl, 0.08 M sodium phosphate dibasic, 0.02 M potassium phosphate monobasic, adjusted at pH 7.4 and filtered 0.2  $\mu\text{m}$ ) to a concentration of 50  $\mu\text{M}$ . Fifty nanoliters of Cecropin were injected into the thorax using a nanoinjector and glass capillary. Flies were left to recover for 2 h and then pricked with the desired pathogen.

### MALDI-TOF

Raw hemolymph samples were collected from either unchallenged flies, or flies pricked with a 1:1 cocktail of *E. coli* and *M. luteus* ( $OD = 200$ ) in 0.1% TFA, as described previously (Hanson et al. 2019a). Samples were then added to an acetonitrile universal matrix. Representative spectra are shown. Immune-induced peaks were identified based on previous studies (Uttenweiler-Joseph et al. 1998; Levy et al. 2004) to confirm the absence of AMP-associated peaks, and presence of immune-induced peptides not affected by the included AMP mutations. Spectra were visualized using mMass and figures were additionally prepared using Inkscape v0.92.

### Statistical analysis

Survival analyses were performed using a Cox proportional hazards (CoxPH) multiple comparison model, with Benjamini–Hochberg corrections for *P*-values, in R 3.6.3. Survival curves included three independent experiments with at least one cohort of 20 flies per treatment. Statistics were represented using a compact letter display (CLD) graphical technique: groups were assigned the same letter if they were not significantly different ( $P > 0.05$ ). Quantitative PCR data included three independent experiments with at least two technical repeats and were compared by one-way ANOVA with Holm–Šidák multiple test correction in Prism R7. Bacterial load values were transformed as  $\log_{10}(\text{value} + 1)$  to allow graphical representation of the absence (0) of CFUs. Bacterial load data were compared by one-way ANOVA with Holm–Šidák multiple test correction in Prism 7. Statistics were represented using a CLD graphical technique.

## Results

### Generation and characterization of cecropin mutants

We generated a fly line lacking the four *cecropin* genes, *CecA1*, *CecA2*, *CecB*, and *CecC*, which are clustered at 99E and are inducible during the systemic response. For this, we used the CRISPR/Cas9 editing method to generate a 6 kb deletion (referred as  $\Delta\text{Cec}^{\text{A-C}}$ ) that removes the four inducible *cecropins* but leaves the related *Andropin* gene intact (Figure 1A). The  $\Delta\text{Cec}^{\text{A-C}}$  mutation was generated by Cas9 mediated injection in the *w*, *DrosDel* (referred to as  $w^{1118}$ ) background. The background of the  $\Delta\text{Cec}^{\text{A-C}}$  mutation was then cleaned by two successive crosses to the  $w^{1118}$  iso background to remove potential off-target alterations. To confirm the absence of *cecropin* genes in  $\Delta\text{Cec}^{\text{A-C}}$  flies, we performed qRT-PCR for the four *cecropin* genes as well as the pseudogene *Cec-Ψ2*. Expression of *CecA* (cumulative expression of *CecA1* and *CecA2*), *CecB*, *CecC*, and *Cec-Ψ2* was readily observed in the wild type, but not detected in  $\Delta\text{Cec}^{\text{A-C}}$  flies; the expression of the nearby *Andropin* gene was not affected (Figure 1, B and C; Supplementary Figure S1, A–C).

We previously generated a fly line in the  $w^{1118}$  iso background here referred to as “ $\Delta\text{AMP10}$ ,” harboring six mutations that remove 10 AMP genes: *Defensin*, *Metchnikowin*, the four Attacins (*A/B/C/D*), *Drosomycin*, two *Diptericins* (*A/B*), and *Drosocin* (Hanson et al., 2019a, 2019b). We recombined the iso  $\Delta\text{Cec}^{\text{A-C}}$  mutation with the iso  $\Delta\text{AMP10}$  mutations to generate an iso fly line lacking all 14 “classical” AMPs (referred to as “ $\Delta\text{AMP14}$ ”). MALDI-TOF and RT-qPCR analysis confirms the absence of these 14 AMPs in  $\Delta\text{AMP10}$  and  $\Delta\text{AMP14}$  flies (Figure 1, B and C; Supplementary Figure S2). The  $\Delta\text{Cec}^{\text{A-C}}$ ,  $\Delta\text{AMP10}$ , and  $\Delta\text{AMP14}$  flies were viable and showed no morphological defects. We also confirmed that the two central NF- $\kappa\text{B}$  signaling pathways, Toll and Imd, were functional, as measured by measuring expression of genes characteristic of each of these pathways (Figure 1, D–F). Furthermore, MALDI-TOF proteomic analysis of hemolymph from infected flies 24 h postinfection (hpi) reveals a wild-type-like induction of peaks associated with other NF- $\kappa\text{B}$  effectors (e.g., Bomanins, Daishos, and Baramicin A) (Supplementary Figure S2). Collectively, our study indicates that we have generated a fly line lacking all the *Drosophila* “classical” AMPs, and that deleting these AMPs does not impact the production of other NF- $\kappa\text{B}$  effectors.

### Cecropins contribute to survival against certain Gram-negative bacterial infections

We used wild-type,  $\Delta\text{Cec}^{\text{A-C}}$ ,  $\Delta\text{AMP10}$ , and  $\Delta\text{AMP14}$  flies to explore the role that Cecropins play in defense against pathogens during systemic infection. By performing survival analyses with wild-type and  $\Delta\text{Cec}^{\text{A-C}}$  flies, we assessed if the absence of the four Cecropins is sufficient to cause an immune deficiency. Likewise, any difference in survival rates between  $\Delta\text{AMP10}$  and  $\Delta\text{AMP14}$  flies would suggest a contribution of Cecropins that is only apparent in the absence of other AMPs. We first focused our attention on Gram-negative bacterial infections, as Cecropins were initially identified for their activity against this class of bacteria. We challenged wild-type,  $\Delta\text{Cec}^{\text{A-C}}$ ,  $\Delta\text{AMP10}$ , and  $\Delta\text{AMP14}$  flies with six different Gram-negative bacterial species, using inoculation doses (given as  $OD_{600}$ ) selected such that Imd deficient, iso *Rel*<sup>E20</sup> mutant control flies were killed. Our survival experiments did not reveal an overt contribution of Cecropins to resistance against the Gram-negative bacteria *P. rettgeri*, *P. carotovorum carotovorum* (*Ecc15*), *E. coli*, or *P. burhodogranariae* (Figure 2, A–D). In all cases,  $\Delta\text{Cec}^{\text{A-C}}$  flies survived as well as wild-type flies, while  $\Delta\text{AMP10}$

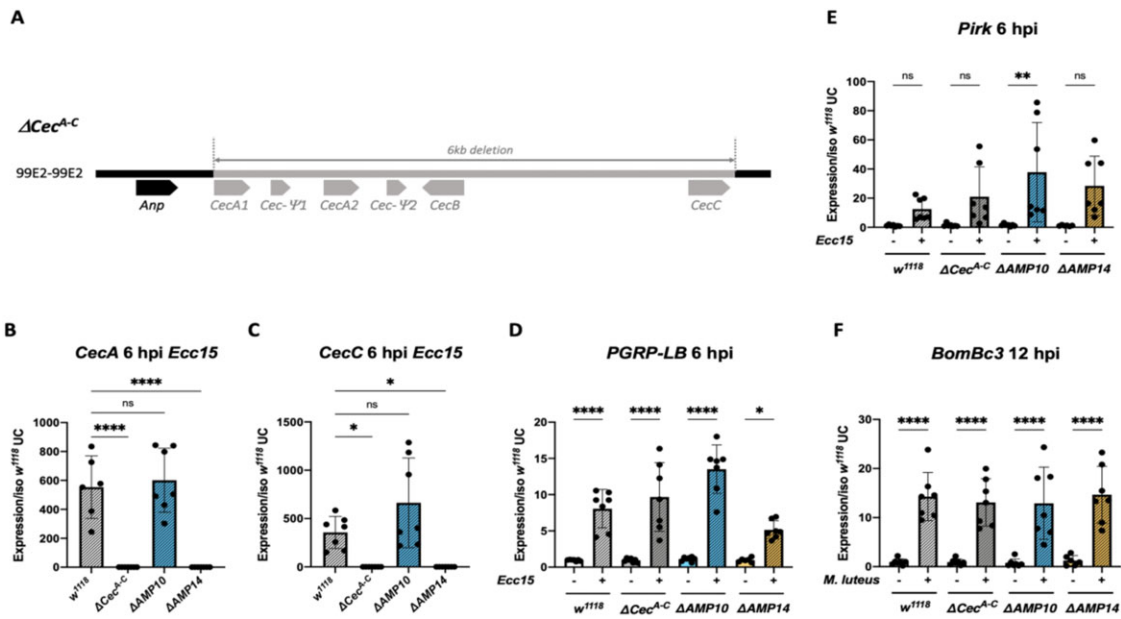

**Figure 1** Description and validation of  $\Delta Cec^{A-C}$ ,  $\Delta AMP10$ , and  $\Delta AMP14$  mutants. (A) Schema of the cecropin locus chromosomal deletion removing *CecA1* and *A2*, *CecB* and *CecC*, plus 2 pseudo genes, *Cec-Ψ1* and *Cec-Ψ2* clustered at position 99E2 (chromosome III). qRT-PCR of *CecA* (B) and *CecC* (C) expression in  $w^{1118}$ ,  $\Delta Cec^{A-C}$ ,  $\Delta AMP10$ , and  $\Delta AMP14$  flies 6 h post *Ecc15* infection. The Imd (D, E) and Toll (F) pathways are functional in  $\Delta Cec^{A-C}$ ,  $\Delta AMP10$ , and  $\Delta AMP14$  flies after challenge as revealed by expression of target genes upon septic injury with *Ecc15* or *M. luteus*. *PGRP-LB* and *Pirk* were used as readouts for the Imd pathway and *Bomanin* (*BomBc3*) for the Toll pathway. Expression was normalized with  $w^{1118}$  UC set as a value of 1.

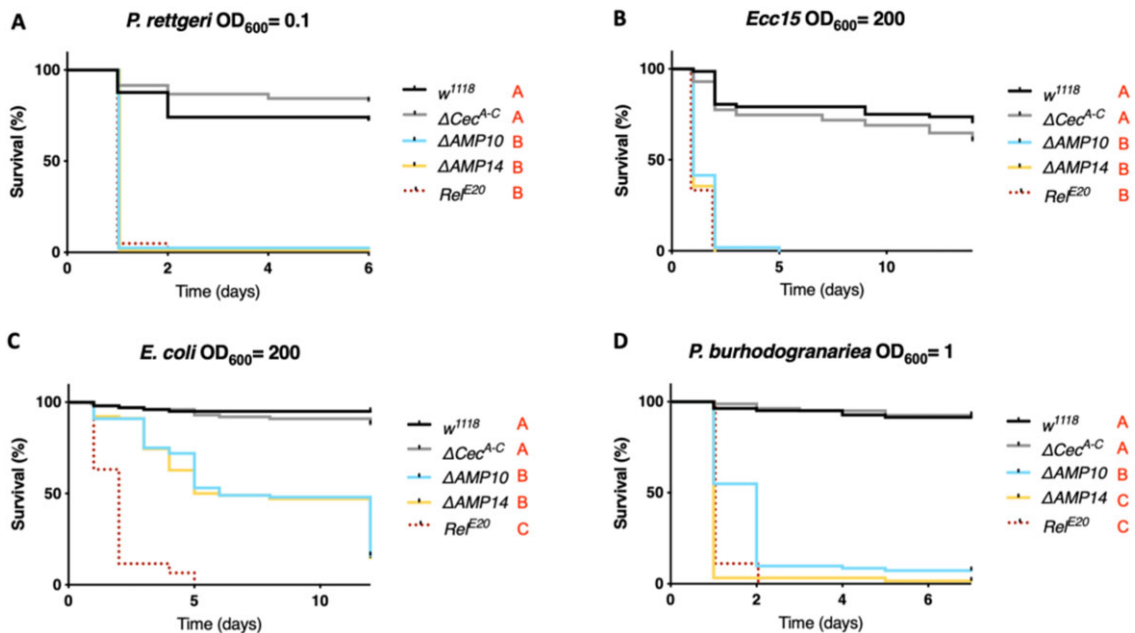

**Figure 2** Cecropins do not determine resistance to a broad spectrum of Gram-negative bacteria.  $w^{1118}$  were used as wild-type flies and  $Rel^{E20}$  as susceptible flies lacking the Imd pathway for all survival experiments to Gram-negative bacterial infection. Female  $w^{1118}$ ,  $\Delta Cec^{A-C}$ ,  $\Delta AMP10$ ,  $\Delta AMP14$ , and  $Rel^{E20}$  flies were pricked in the thorax with an inoculum of (A) *P. rettgeri*, (B) *Ecc15*, (C) *E. coli*, or (D) *P. burhodogranaria*. Cecropins were not critically involved in combating infection with any bacteria presented here as  $\Delta Cec^{A-C}$  survived as well as  $w^{1118}$  flies, while  $\Delta AMP10$  and  $\Delta AMP14$  mutant flies died as fast as  $Rel^{E20}$  mutants. Bacterial concentrations are indicated in the figure.

flies were as susceptible as  $\Delta AMP14$ . One exception was found for *P. burhodogranaria* infection: death of  $\Delta AMP10$  flies was delayed by 1 day compared with  $\Delta AMP14$  flies, suggesting a contribution of Cecropins in combatting this bacterium early in infection.

Interestingly, we did identify a prominent role for cecropins against two Gram-negative bacterial strains: *E. cloacae* and

*P. heimbachae*. Although  $\Delta Cec^{A-C}$  flies survived *E. cloacae* infection like wild-type flies and many  $\Delta AMP10$  flies survived this infection,  $\Delta AMP14$  flies, instead behaved like  $Rel^{E20}$  mutants lacking Imd signaling entirely (Figure 3A). This result suggests that the presence of the four cecropin genes confers a protective effect against this bacterium in flies that lack 10 other AMP genes. A significant difference in CFUs between  $\Delta AMP10$  and  $\Delta AMP14$  flies

at 8 hpi confirmed a role of Cecropins in limiting the growth of *E. cloacae* (Figure 3B). We also observed a consistently higher bacterial load in  $\Delta\text{Cec}^{\text{A-C}}$  flies compared with wild-type controls, though this was not significant ( $P = 0.063$ ). Moreover,  $\Delta\text{AMP14}$  and  $\text{Rel}^{\text{E20}}$  fly CFUs were similar, consistent with survival data showing complete mortality of these genotypes within 24 h. These results indicate that the knock-out of the “classical” AMPs in the  $\Delta\text{AMP14}$  line fully explains the susceptibility of Imd pathway mutants to *E. cloacae* infection. Next, we attempted to rescue the susceptibility of  $\Delta\text{AMP10}$  and  $\Delta\text{AMP14}$  flies using commercially available Cecropin. We injected 50 nl of 50  $\mu\text{M}$  *H. cecropia* Cecropin (Sigma-Aldrich) or PBS (control) 2 h before challenging flies with *E. cloacae*. Interestingly, when we injected Cecropin 2 h prior to *E. cloacae* infection,  $\Delta\text{AMP10}$  flies survived significantly better than  $\Delta\text{AMP14}$  flies previously injected with only PBS (Figure 3C). This result suggests that priming the fly defense by increasing circulating levels of Cecropin is sufficient to combat *E. cloacae* infection, even in flies lacking a broad range of other AMPs. However, we did not succeed in rescuing the susceptibility

of  $\Delta\text{AMP14}$  flies using the same approach. This suggests the rescue effect we observed using  $\Delta\text{AMP10}$  flies relies on the total Cecropin levels, which includes both endogenously produced Cecropin and the supplemental Cecropin we injected. Collectively, our *in vivo* analysis is consistent with previous *in vitro* studies that showed commercial Cecropin from *H. cecropia* has activity against *E. cloacae* (Hultmark et al. 1980).

Similarly, we observed a contribution of Cecropins against the Gram-negative bacterium *P. heimbachae* in flies lacking other AMPs (Figure 3D–F). While  $\Delta\text{AMP10}$  flies were able to survive this infection at levels close to wild-type flies at  $\text{OD}_{600} = 50$ ,  $\Delta\text{AMP14}$  flies again behaved like  $\text{Rel}^{\text{E20}}$  mutants and suffered complete mortality (Figure 3D); the  $\Delta\text{Cec}^{\text{A-C}}$  mutation alone did not increase susceptibility. Bacterial load measurement performed on flies collected 24 hpi revealed a contribution of Cecropins both in the presence and absence of other AMPs (Figure 3E). We again injected commercial *H. cecropia* Cecropin in an attempt to rescue the susceptibility of  $\Delta\text{AMP10}$  and  $\Delta\text{AMP14}$  flies to *P. heimbachae* (Figure 3F). Using this bacterial infection model, previous

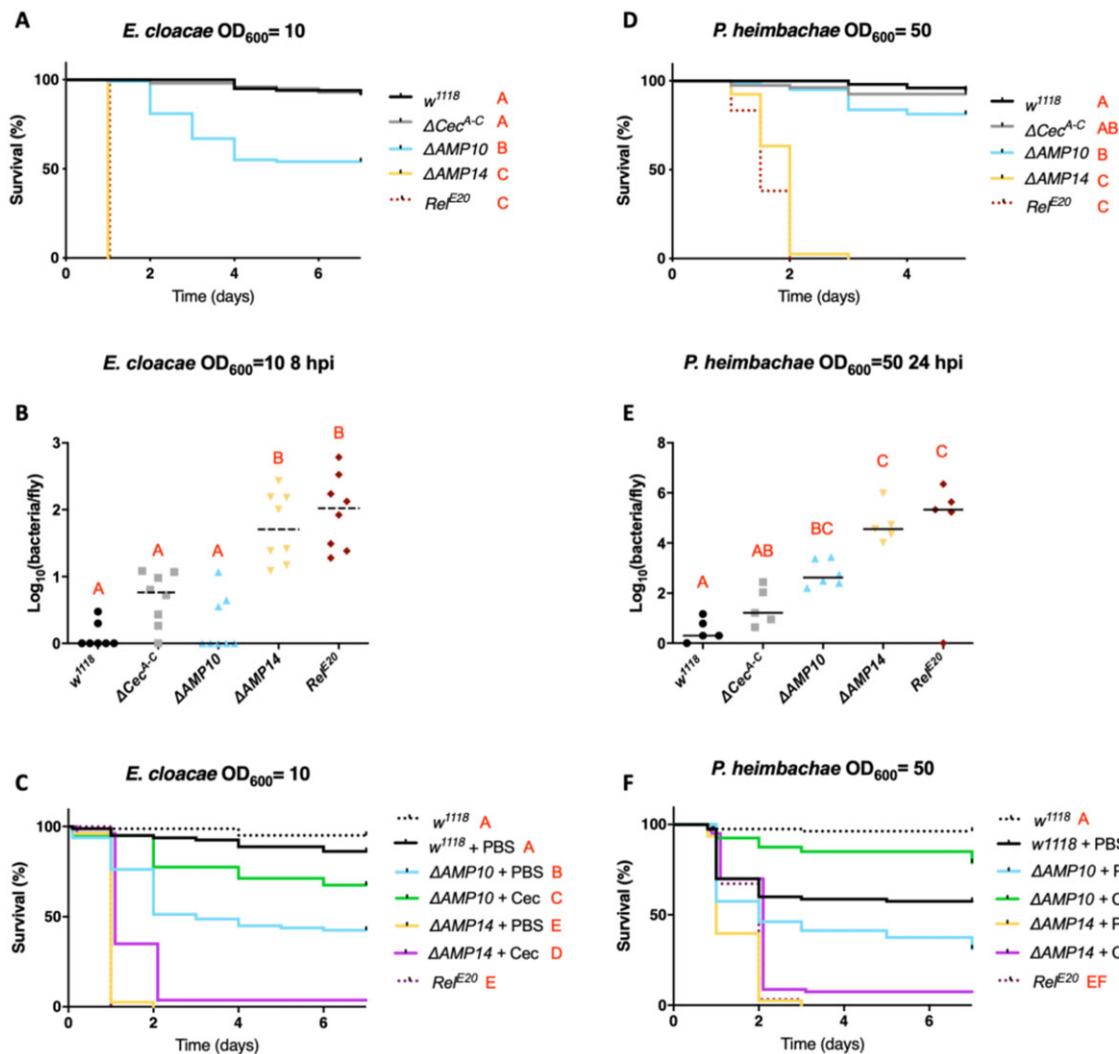

**Figure 3** Cecropins are essential in the absence of other AMPs to resist *E. cloacae* and *P. heimbachae* infection. (A) Survival experiments upon infection with *E. cloacae* reveal that AMP deficient flies having Cecropins ( $\Delta\text{AMP10}$ ) are significantly more resistant than those without Cecropins ( $\Delta\text{AMP14}$ ). (B) Bacterial loads (CFU counts) of  $w^{1118}$ ,  $\Delta\text{Cec}^{\text{A-C}}$ ,  $\Delta\text{AMP10}$ ,  $\Delta\text{AMP14}$ , and  $\text{Rel}^{\text{E20}}$  flies 8 h postinfection reveal a significant role for Cecropins in clearing and controlling *E. cloacae*. (C) Commercial Cecropin injection (50 nl at 50  $\mu\text{M}$ ) 2 h prior to *E. cloacae* infection increases the resistance of  $\Delta\text{AMP10}$  mutant flies. However, CecA injection did not rescue the susceptibility of  $\Delta\text{AMP14}$  flies to *E. cloacae*. Survival analysis (D), bacterial load measurements 24 h postinfection (E), and Cecropin supplementation experiments (F) in  $w^{1118}$ ,  $\Delta\text{Cec}^{\text{A-C}}$ ,  $\Delta\text{AMP10}$ ,  $\Delta\text{AMP14}$ , and  $\text{Rel}^{\text{E20}}$  flies upon infection with *P. heimbachae* (as described in A–C).

injection of PBS increased the susceptibility of wild-type flies to *P. heimbachae*. Strikingly, however, injection of Cecropin prior to infection rescued survival of  $\Delta$ AMP10 flies to a level close to previously uninjured wild-type flies.

We have recently shown that the antibacterial peptide Drosocin (Dro) is specially required to resist infection with *E. cloacae*. This raises the possibility that Cecropin and Drosocin synergistically contribute to the host defense against this bacterium. To investigate this question, we generated a double mutant line for the Drosocin and cecropin genes (*Dro*<sup>SK4</sup>;  $\Delta$ Cec<sup>A-C</sup>). Ultimately this double mutant line died with similar kinetics to Drosocin single mutants against *E. cloacae* (Supplementary Figure S3). We also found no susceptibility of Drosocin or Cecropin single or double mutants to *P. heimbachae* (data not shown). Thus, we found no prominent synergy between Drosocin and the Cecropins. This suggests that Cecropins are redundant alongside other AMPs in defense against these bacteria, and do not have a highly specific interaction like Drosocin and *E. cloacae*.

In summary, our results reveal that Cecropins contribute to *Drosophila* host defense against a subset of Gram-negative bacteria, and that this contribution is more readily apparent when other AMPs are also lacking.

### Cecropins are not involved in the resistance to Gram-positive bacteria

Previous work with the  $\Delta$ AMP10 flies did not reveal a role of *Drosophila* AMPs against Gram-positive bacteria, indicating instead that other immune effectors—notably the bomanins—play a predominant role against this class of microbes (Hanson et al. 2019a; Lin et al. 2020). Therefore, we were curious if the added loss of Cecropins would reveal a cryptic contribution of *Drosophila* AMPs to defense against Gram-positive bacteria. For this, we challenged wild-type,  $\Delta$ Cec<sup>A-C</sup>,  $\Delta$ AMP10, and  $\Delta$ AMP14 flies with three Gram-positive bacteria: *E. faecalis*, *S. pneumoniae*, and *L. monocytogenes* (Figure 4, A–C). *Enterococcus faecalis* and *S. pneumoniae* contain Lysine-type peptidoglycan that is known to predominantly activate the Toll pathway while *L. monocytogenes* has DAP-type peptidoglycan, and is known to activate both the Toll and Imd pathways (Leulier et al. 2003). In these experiments, we included iso *Bom*<sup>A55C</sup> control flies, which lack 10 Bomanin genes and are known to be susceptible to Gram-positive bacterial and fungal infections (Clemmons et al. 2015). Our survival experiments did not reveal a major role of Cecropins individually or alongside other AMPs in combating these Gram-positive bacterial species, but confirmed the importance of bomanins (Figure 4, A–C).

### Cecropins can contribute to antifungal defense

While Cecropins were initially identified as antibacterial peptides, further *in vitro* studies have also suggested an antifungal activity (Ekengren and Hultmark 1999; Andr a et al. 2001). We therefore investigated the contribution of Cecropins to resistance upon septic injury with four fungal species: the entomopathogenic fungi *M. rileyi* and *B. bassiana*, the opportunistic mold *A. fumigatus*, and the yeast *C. albicans*. Survival analysis did not reveal a major susceptibility of any AMP mutants against *M. rileyi* (Figure 5A). However,  $\Delta$ AMP14 flies were more susceptible to *A. fumigatus* and *C. albicans* septic infection, and suffered greater mortality to *B. bassiana* natural infection, compared to  $\Delta$ AMP10 and wild-type flies (Figure 5, B–D). This indicates a role for Cecropins in resistance to these three fungi, revealed best in the absence of other AMPs. In order to confirm the importance of Cecropins in limiting fungal proliferation, we introduced

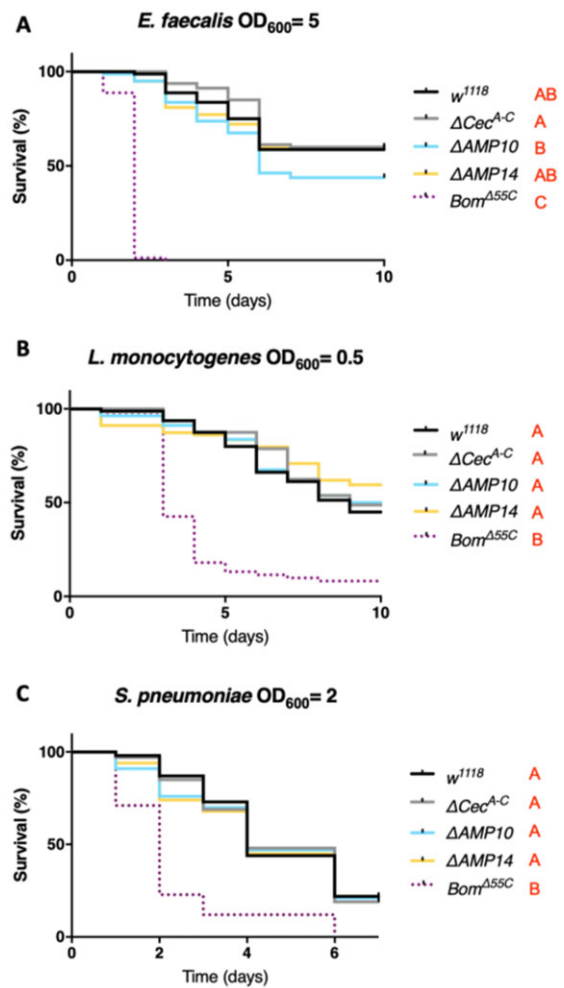

**Figure 4** Cecropins are not involved in resistance to Gram-positive bacteria. *w*<sup>1118</sup> were used as wild-type flies and *Bom*<sup>A55C</sup> as susceptible flies lacking 10 Bomanin genes for all survival experiments to Gram-positive bacterial infection. *w*<sup>1118</sup>,  $\Delta$ Cec<sup>A-C</sup>,  $\Delta$ AMP10,  $\Delta$ AMP14, and *Bom*<sup>A55C</sup> flies were pricked in the thorax with an inoculum of (A) *E. faecalis*, (B) *L. monocytogenes*, or (C) *S. pneumoniae*. Cecropins were not involved in combating infection of these three bacterial species:  $\Delta$ Cec<sup>A-C</sup>,  $\Delta$ AMP10, and  $\Delta$ AMP14 flies survived as well as *w*<sup>1118</sup> flies. Bacterial concentrations are indicated in the figure.

*B. bassiana* spores directly into the hemolymph by septic injury for more controlled fungal infection kinetics, and measured fungal load at 48 h hpi by qPCR. Monitoring pathogen load revealed that in  $\Delta$ AMP14 flies, *B. bassiana* loads were higher than levels found in wild type ( $P = 0.07$ ) and  $\Delta$ AMP10 flies (Figure 5E), albeit not significantly. Taken together, these results show a contribution of Cecropins to defense against fungal pathogens such as *B. bassiana*, *A. fumigatus* and *C. albicans*.

## Discussion

In this study, we generated flies lacking the four-immune inducible cecropin genes to address their function alone or in combination with other AMP gene mutations.  $\Delta$ Cec<sup>A-C</sup> and  $\Delta$ AMP14 flies were viable, fertile and did not show any morphological defect. Moreover, they display normal activation of the Imd and Toll pathways, suggesting that the classical *Drosophila* AMPs do not contribute to immune signaling, in contrast to mammalian AMPs (Mookherjee et al. 2020).

Our survival analyses reveal a role of Cecropins in the defense against certain Gram-negative bacterial species (specifically against Gammaproteobacteria). However, we could not identify a bacterial species or context for which flies mutant for *cecropin* genes alone succumb faster than wild-type. Studies of other AMPs have revealed that certain AMPs exhibit a high degree of specificity in determining host-pathogen interactions, as illustrated by the requirement of Diptericin in defense against *P. rettgeri*, Drosocin in defense against *E. cloacae*, and the recently described *Daisho* and *Baramicin A* genes in defense against *Fusarium oxysporum* and *B. bassiana* fungi, respectively (Unckless et al. 2016; Hanson et al. 2019a, 2021; Cohen et al. 2020). Further studies may reveal bacteria for which the presence of Cecropins is essential for survival.

The most striking phenotype in the present study was that loss of Cecropins has a marked effect on *E. cloacae* and *P. heimbachae* infection in flies also lacking other AMP genes. As such, we reveal an important but cryptic contribution of Cecropins in defense against these bacteria. Generation of flies lacking refined subsets of AMPs might narrow down the specific groups of peptides key to defense against *E. cloacae* and *P. heimbachae*. The enhanced growth of *E. cloacae* in AMP mutants that also lack Cecropins is a particularly striking demonstration of their

importance. In this infection model, the presence of Cecropins dictates whether AMP mutant flies initially suppress bacterial growth, or phenocopy *Rel<sup>E20</sup>* flies deficient for Imd signaling. Cecropins are induced with faster kinetics than most other AMPs, with a peak expression as early as 3 hpi (Lemaitre et al. 1997; De Gregorio et al. 2002; Schlamp et al. 2021). As *cecropins* encode simple helical peptides that do not require extensive post-translational modification, it is tempting to speculate that they become functional more rapidly, and play an important role in combatting bacteria specifically at this early phase of infection, likely in cooperation with melanization and phagocytosis, two more immediate host defenses (Haine et al. 2008; Dudzic et al. 2019).

Our study also reveals that endogenous Cecropins can play a role in defense against certain fungi, but not against Gram-positive bacteria tested so far (i.e., Firmicutes). Thus, our *in vivo* study corroborates the antifungal and antibacterial activities of Cecropins previously observed with *in vitro* studies (Samakovlis et al. 1990; DeLuca et al. 1997; Ekengren and Hultmark 1999). While IMD is crucial for the expression of the four Cecropins, the Cecropin response to infection also relies on Toll signaling (De Gregorio et al. 2002; Hedengren-Olcott et al. 2004). As such, the contribution of

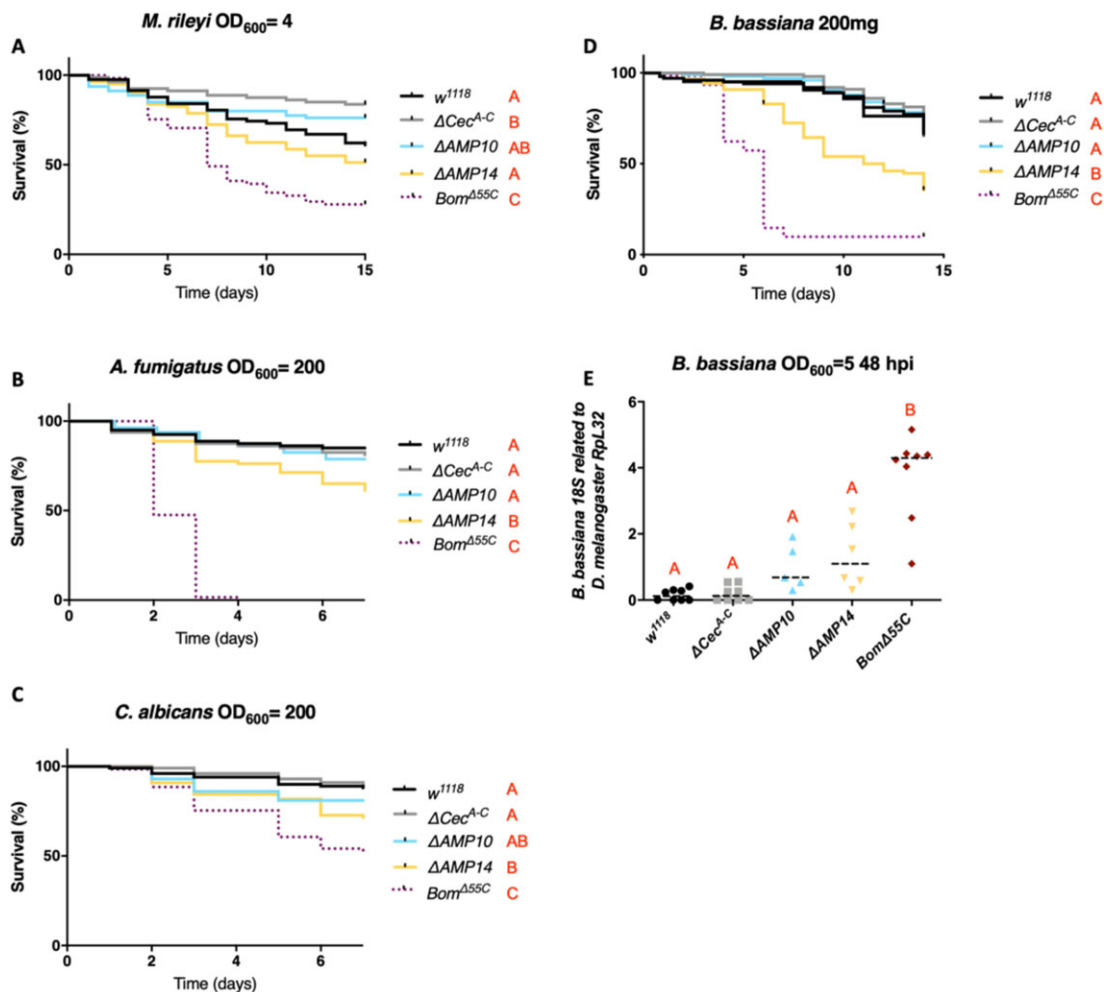

**Figure 5** Cecropins contribute to antifungal defense against *A. fumigatus*, *C. albicans*, and *B. bassiana*. *w<sup>1118</sup>* were used as wild-type flies and *Bom<sup>Δ55C</sup>* as susceptible flies lacking 10 *Bomanin* genes for all survival experiments to fungal infections. Cecropins were not involved in combating infection of (A) *M. rileyi* as *w<sup>1118</sup>*,  $\Delta$ *Cec<sup>A-C</sup>*,  $\Delta$ *AMP10*, and  $\Delta$ *AMP14* flies survived as well as *w<sup>1118</sup>* flies. Survival upon (B) *A. fumigatus* or (C) *C. albicans* septic infection, and (D) natural infection with *B. bassiana* reveals a significant increase in resistance of  $\Delta$ *AMP10* flies compared to  $\Delta$ *AMP14* flies, suggesting an important role for Cecropins in fighting these fungi. (E) *Beauveria bassiana* load (measured by *B. bassiana* 18S expression related to *D. melanogaster* RpL32) is higher ( $P = 0.07$ ) in  $\Delta$ *AMP14* flies compared with *w<sup>1118</sup>*,  $\Delta$ *Cec<sup>A-C</sup>*, and  $\Delta$ *AMP10* flies 48 h postseptic infection. Fungal concentrations are indicated in the figure.

Cecropins to defense against fungi could help explain the regulation of the cecropin locus by both the Toll and Imd pathways.

The observations that AMP genes are induced to great extent, reach high peptide concentrations in the hemolymph, and display *in vitro* microbicidal activity are all consistent with a role as immune effectors. Use of both  $\Delta$ AMP10 and  $\Delta$ AMP14 flies has confirmed the important contribution of AMPs to host defense against certain Gram-negative bacteria and fungi, but not against the Gram-positive bacteria tested so far. It is possible that incorporating more diverse bacteria and fungi could reveal additional roles of AMPs, as the pathogens traditionally used in *Drosophila* immune studies are restricted to only a few major clades. *Drosophila* AMPs also regulate the gut microbiota downstream of the Imd pathway, a function consistent with their bactericidal activity (Marra et al. 2021). However, recent studies have suggested that AMP-like genes may play more subtle roles in other processes like memory formation (Barajas-Azpeleta et al. 2018), an erect wing response upon infection (Hanson et al. 2021), tumor control (Parvy et al. 2019; Araki et al. 2019), or regulation of JNK signaling in the salivary gland (Krautz et al. 2020). While we confirm a primary importance for Cecropins and other AMPs in the systemic immune response, exploring the functions of AMPs in noncanonical roles is an exciting future direction of research.

Our study and others contribute to the rapid progress made toward understanding the roles of *Drosophila* immune effectors. Research on the effector response has stagnated for over a decade, but recent functional characterizations by loss of function of key effectors (Cecropins, Defensin, Attacins, Dipterocins, Drosocin, Drosomycin, Metchnikowin, Bomanins, Daishos, and Baramicin) has greatly advanced our understanding of the roles of these effectors (Lindsay et al. 2018; Hanson et al. 2019a; Cohen et al. 2020; Huang et al. 2020). Most importantly, these studies amend the assumptions of the previous “cocktail” model for AMP-pathogen interactions (Yan and Hancock 2001; Lazzaro 2008; Zdybicka-Barabas et al. 2012; Rahnamaeian et al. 2016), revealing some AMPs to be general effectors against most pathogens, while others act as “silver bullets” specifically required for defense against certain pathogens. The susceptibility of Toll and Imd pathway mutants to specific pathogens can now be directly linked to the susceptibility of mutants for immune effectors regulated by these pathways (Hanson and Lemaitre 2020). As new genetic techniques allow greater characterization of the roles of known immune effectors, many of them remain to be characterized, notably a number of short peptide genes highlighted by transcriptomic studies (Gregorio et al. 2001; Troha et al. 2018; Tattikota et al. 2020; Cattenoz et al. 2020; Schlamp et al. 2021). However, we are likely still exploring inside the box when assuming a uniquely immune role for these peptides.

Our study also highlights the power of multiple mutation analysis, as the role of Cecropins would not have been uncovered *in vivo* by mutating individual genes. While we have begun exploring the combinatorial potential of AMPs in defense against infection, future studies will benefit from probing the interaction of immune effectors like AMPs with other mechanisms of host defense such as phagocytosis or melanization. With the advent of CRISPR/Cas9 technology and many recently described mutants, the interactions of AMPs in defense are just the tip of the iceberg in developing a global framework to understand the *Drosophila* immune response.

## Data availability

Data generated or analyzed during this study are included in the manuscript and its supplementary files.

Supplementary material is available at GENETICS online.

## Acknowledgments

We are thankful to the EPFL Proteomics Core Facility for help with the MALDI-TOF analysis. Brian Lazzaro generously provided *Providencia* species (Galac and Lazzaro 2011) and Adam Bajgar (Krejčová et al. 2019) provided *Streptococcus pneumoniae* species used in this study. We thank Hannah Westlake for editing of the manuscript.

## Funding

This study was funded by the Swiss National Science Foundation Sinergia, Grant number CRSII5\_186397.

## Conflicts of interest

The authors declare that there is no conflict of interest.

## Literature cited

- Andrä J, Berninghausen O, Leippe M. 2001. Cecropins, antibacterial peptides from insects and mammals, are potently fungicidal against *Candida albicans*. *Med Microbiol Immunol*. 189:169–173. doi:10.1007/s430-001-8025-x.
- Araki M, Kurihara M, Kinoshita S, Awane R, Sato T, et al. 2019. Anti-tumour effects of antimicrobial peptides, components of the innate immune system, against haematopoietic tumours in *Drosophila* mxc mutants. *Dis Model Mech*. 12. doi:10.1242/dmm.037721.
- Barajas-Azpeleta R, Wu J, Gill J, Welte R, Seidel C, et al. 2018. Antimicrobial peptides modulate long-term memory. *PLoS Genet*. 14:e1007440. doi:10.1371/journal.pgen.1007440.
- Basset A, Khush RS, Braun A, Gardan L, Boccard F, et al. 2000. The phytopathogenic bacteria *Erwinia carotovora* infects *Drosophila* and activates an immune response. *Proc Natl Acad Sci USA*. 97:3376–3381. doi:10.1073/pnas.97.7.3376.
- Broekaert WF, Terras' G, Cammue A, Osborn RW. 1995. Plant defensins: novel antimicrobial peptides as components of the host defense system. *Plant Physiol*. 108:6.
- Bulet P, Hetru C, Dimarcq J-L, Hoffmann D. 1999. Antimicrobial peptides in insects; structure and function. *Dev Comp Immunol*. 23:329–344. doi:10.1016/S0145-305X(99)00015-4.
- Cattenoz PB, Sakr R, Pavlidaki A, Delaporte C, Riba A, et al. 2020. Temporal specificity and heterogeneity of *Drosophila* immune cells. *EMBO J*. 39:e104486. doi:10.15252/embj.2020104486.
- Chiou PP, Lin C-M, Perez L, Chen TT. 2002. Effect of Cecropin B and a synthetic analogue on propagation of fish viruses *in vitro*. *Mar Biotechnol (NY)*. 4:294–302. doi:10.1007/s10126-002-0021-1.
- Clemmons AW, Lindsay SA, Wasserman SA. 2015. An effector peptide family required for *Drosophila* toll-mediated immunity. *PLoS Pathog*. 11:e1004876. doi:10.1371/journal.ppat.1004876.
- Coca M, Bortolotti C, Rufat M, Peñas G, Eritja R, et al. 2004. Transgenic rice plants expressing the antifungal AFP protein from *Aspergillus giganteus* Show enhanced resistance to the rice blast fungus *Magnaporthe grisea*. *Plant Mol Biol*. 54:245–259. doi:10.1023/B:PLAN.0000028791.34706.80.
- Cohen LB, Lindsay SA, Xu Y, Lin SJH, Wasserman SA. 2020. The Daisho peptides mediate *Drosophila* defense against a subset of filamentous fungi. *Front Immunol*. 11:9. doi:10.3389/fimmu.2020.00009.



- De Gregorio E, Spellman PT, Tzou P, Rubin GM, Lemaitre B. 2002. The Toll and Imd pathways are the major regulators of the immune response in *Drosophila*. *EMBO J.* 21:2568–2579. doi:10.1093/emboj/21.11.2568.
- DeLuca AJ, Bland JM, Jacks TJ, Grimm C, Cleveland TE, et al. 1997. Fungicidal activity of cecropin A. *Antimicrob Agents Chemother.* 41:481–483. doi:10.1128/AAC.41.2.481.
- Deslouches B, Di YP. 2017. Antimicrobial peptides with selective antitumor mechanisms: prospect for anticancer applications. *Oncotarget.* 8:46635–46651. doi:10.18632/oncotarget.16743.
- Dudzic JP, Hanson MA, Iatsenko I, Kondo S, Lemaitre B. 2019. More than black or white: melanization and Toll share regulatory serine proteases in *Drosophila*. *Cell Rep.* 27:1050–1061.e3. doi:10.1016/j.celrep.2019.03.101.
- Ekengren S, Hultmark D. 1999. *Drosophila* cecropin as an antifungal agent. *Insect Biochem Mol Biol.* 29:965–972. doi:10.1016/S0965-1748(99)00071-5.
- Ferreira ÁG, Naylor H, Esteves SS, Pais IS, Martins NE, et al. 2014. The Toll-dorsal pathway is required for resistance to viral oral infection in *Drosophila*. *PLOS Pathog.* 10:e1004507. doi:10.1371/journal.ppat.1004507.
- Galac MR, Lazzaro BP. 2011. Comparative pathology of bacteria in the genus *Providencia* to a natural host, *Drosophila melanogaster*. *Microbes Infect.* 13:673–683. doi:10.1016/j.micinf.2011.02.005.
- Ganz T, Selsted ME, Szklarek D, Harwig SS, Daher K, et al. 1985. Defensins. Natural peptide antibiotics of human neutrophils. *J Clin Invest.* 76:1427–1435. doi:10.1172/JCI112120.
- Gregorio ED, Spellman PT, Rubin GM, Lemaitre B. 2001. Genome-wide analysis of the *Drosophila* immune response by using oligonucleotide microarrays. *Proc Natl Acad Sci USA.* 98:12590–12595. doi:10.1073/pnas.221458698.
- Haine ER, Moret Y, Siva-Jothy MT, Rolff J. 2008. Antimicrobial defense and persistent infection in insects. *Science.* 322:1257–1259. doi:10.1126/science.1165265.
- Hanson MA, Dostálová A, Ceroni C, Poidevin M, Kondo S, et al. 2019a. Synergy and remarkable specificity of antimicrobial peptides in vivo using a systematic knockout approach. *eLife.* 8:e44341. doi:10.7554/eLife.44341.
- Hanson MA, Dostálová A, Ceroni C, Poidevin M, Kondo S, et al. 2019b. Correction: synergy and remarkable specificity of antimicrobial peptides in vivo using a systematic knockout approach. *eLife.* 8:e48778. doi:10.7554/eLife.48778.
- Hanson MA, Lemaitre B. 2020. New insights on *Drosophila* antimicrobial peptide function in host defense and beyond. *Curr Opin Immunol.* 62:22–30. doi:10.1016/j.coi.2019.11.008.
- Hanson MA, Cohen LB, Marra A, Iatsenko I, Wasserman SA, et al. 2021. The *Drosophila* Baramicin polypeptide gene protects against fungal infection. *PLoS Pathog.* 17:e1009846. doi:10.1371/journal.ppat.1009846.
- Hedengren-Olcott M, Olcott MC, Mooney DT, Ekengren S, Geller BL, et al. 2004. Differential activation of the NF- $\kappa$ B-like factors relish and Dif in *Drosophila melanogaster* by fungi and Gram-positive bacteria. *J Biol Chem.* 279:21121–21127. doi:10.1074/jbc.M313856200.
- Huang J, Lou Y, Liu J, Bulet P, Jiao R, et al. 2020. The BaramicinA gene is required at several steps of the host defense against *Enterococcus faecalis* and *Metarhizium robertsii* in a septic wound infection model in *Drosophila melanogaster*. *bioRxiv.* doi:10.1101/2020.11.23.394809.
- Hultmark D, Steiner H, Rasmuson T, Boman HG. 1980. Insect immunity. Purification and properties of three inducible bactericidal proteins from hemolymph of immunized pupae of *Hyalophora cecropia*. *Eur J Biochem.* 106:7–16. doi:10.1111/j.1432-1033.1980.tb05991.x.
- Imler J-L, Bulet P. 2005. Antimicrobial peptides in *Drosophila*: structures, activities and gene regulation. *Mech Epithelial Defense.* 86:1–21. doi:10.1159/000086648.
- Kalsy M, Tonk M, Hardt M, Dobrindt U, Zdybicka-Barabas A, et al. 2020. The insect antimicrobial peptide cecropin A disrupts uropathogenic *Escherichia coli* biofilms. *NPJ Biofilms Microbiomes.* 6:6–8. doi:10.1038/s41522-020-0116-3.
- Kokoza V, Ahmed A, Woon Shin S, Okafor N, Zou Z, et al. 2010. Blocking of plasmodium transmission by cooperative action of Cecropin A and Defensin A in transgenic *Aedes aegypti* mosquitoes. *Proc Natl Acad Sci USA.* 107:8111–8116. doi:10.1073/pnas.1003056107.
- Kounatidis I, Chtarbanova S, Cao Y, Hayne M, Jayanth D, Ganetzky B, et al. 2017. NF- $\kappa$ B Immunity in the brain determines fly lifespan in healthy aging and age-related neurodegeneration. *Cell Reports.* 19:836–848. 28445733.
- Krautz R, Khalili D, Theopold U. 2020. Tissue-autonomous immune response regulates stress signaling during hypertrophy. *Elife.* 9:e64919. doi:10.7554/eLife.64919.
- Krejčová G, Danielová A, Nedbalová P, Kazek M, Strych L, et al. 2019. *Drosophila* macrophages switch to aerobic glycolysis to mount effective antibacterial defense. *eLife.* 8:e50414. doi:10.7554/eLife.50414.
- Kylsten P, Samakovlis C, Hultmark D. 1990. The cecropin locus in *Drosophila*; a compact gene cluster involved in the response to infection. *EMBO J.* 9:217–224. doi:10.1002/j.1460-2075.1990.tb08098.x.
- Lazzaro BP. 2008. Natural selection on the *Drosophila* antimicrobial immune system. *Curr Opin Microbiol.* 11:284–289. doi:10.1016/j.mib.2008.05.001.
- Lemaitre B, Reichhart J-M, Hoffmann JA. 1997. *Drosophila* host defense: differential induction of antimicrobial peptide genes after infection by various classes of microorganisms. *Proc Natl Acad Sci USA.* 94:14614–14619. doi:10.1073/pnas.94.26.14614.
- Lemaitre B. 2004. The road to Toll. *Nat Rev Immunol.* 4:521–527. doi:10.1038/nri1390.
- Leulier F, Parquet C, Pili-Floury S, Ryu J-H, Caroff M, et al. 2003. The *Drosophila* immune system detects bacteria through specific peptidoglycan recognition. *Nat Immunol.* 4:478–484. doi:10.1038/ni922.
- Levy F, Bulet P, Ehret-Sabatier L. 2004. Proteomic analysis of the systemic immune response of *Drosophila*. *Mol Cell Proteomics.* 3:156–166. doi:10.1074/mcp.M300114-MCP200.
- Lin SJH, Cohen LB, Wasserman SA. 2020. Effector specificity and function in *Drosophila* innate immunity: getting AMPed and dropping Boms. *PLoS Pathog.* 16:e1008480. doi:10.1371/journal.ppat.1008480.
- Lindsay SA, Lin SJH, Wasserman SA. 2018. Short-form Bomanins mediate humoral immunity in *Drosophila*. *J Innate Immun.* 10:306–314. doi:10.1159/000489831.
- Marra A, Hanson MA, Kondo S, Erkosar B, Lemaitre B. 2021. *Drosophila* antimicrobial peptides and lysozymes regulate gut microbiota composition and abundance. *mBio.* 12:e0082421. doi:10.1128/mBio.00824-21.
- Mookherjee N, Anderson MA, Haagsman HP, Davidson DJ. 2020. Antimicrobial host defence peptides: functions and clinical potential. *Nat Rev Drug Discov.* 19:311–332. doi:10.1038/s41573-019-0058-8.
- Ouyang L, Xu X, Freed S, Gao Y, Yu J, et al. 2015. Cecropins from *Plutella xylostella* and their interaction with *Metarhizium anisopliae*. *PLoS One.* 10:e0142451. doi:10.1371/journal.pone.0142451.
- Parvy J-P, Yu Y, Dostalova A, Kondo S, Kurjan A, et al. 2019. The antimicrobial peptide defensin cooperates with tumour necrosis factor to drive tumour cell death in *Drosophila*. *eLife.* 8:e45061. doi:10.7554/eLife.45061.

- Rahnamaeian M, Cytryńska M, Zdybicka-Barabas A, Vilcinskas A. 2016. The functional interaction between abaecin and pore-forming peptides indicates a general mechanism of antibacterial potentiation. *Peptides*. 78:17–23. doi:10.1016/j.peptides.2016.01.016.
- Ryu J-H, Kim S-H, Lee H-Y, Bai JY, Nam Y-D, et al. 2008. Innate immune homeostasis by the homeobox gene *caudal* and commensal-gut mutualism in *Drosophila*. *Science*. 319:777–782. doi:10.1126/science.1149357.
- Sackton TB, Lazzaro BP, Schlenke TA, Evans JD, Hultmark D, et al. 2007. Dynamic evolution of the innate immune system in *Drosophila*. *Nat Genet*. 39:1461–1468. doi:10.1038/ng.2007.60.
- Samakovlis C, Kimbrell DA, Kylsten P, Engström A, Hultmark D. 1990. The immune response in *Drosophila*: pattern of cecropin expression and biological activity. *EMBO J*. 9:2969–2976. doi:10.1002/j.1460-2075.1990.tb07489.x.
- Samakovlis C, Kylsten P, Kimbrell DA, Engström A, Hultmark D. 1991. The andropin gene and its product, a male-specific antibacterial peptide in *Drosophila melanogaster*. *EMBO J*. 10:163–169. doi:10.1002/j.1460-2075.1991.tb07932.x.
- Schlamp F, Delbare SYN, Early AM, Wells MT, Basu S, et al. 2021. Dense time-course gene expression profiling of the *Drosophila melanogaster* innate immune response. *BMC Genomics*. 22:304. doi:10.1186/s12864-021-07593-3.
- Seo M-D, Won H-S, Kim J-H, Mishig-Ochir T, Lee B-J. 2012. Antimicrobial peptides for therapeutic applications: a review. *Molecules*. 17:12276–12286. doi:10.3390/molecules171012276.
- Steiner H, Hultmark D, Engström A, Bennich H, Boman HG. 1981. Sequence and specificity of two antibacterial proteins involved in insect immunity. *Nature*. 292:246–248. doi:10.1038/292246a0.
- Steiner H, Andreu D, Merrifield RB. 1988. Binding and action of cecropin and cecropin analogues: antibacterial peptides from insects. *Biochim Biophys Acta*. 939:260–266. doi:10.1016/0005-2736(88)90069-7.
- Suttman H, Retz M, Paulsen F, Harder J, Zwergel U, et al. 2008. Antimicrobial peptides of the Cecropin-family show potent antitumor activity against bladder cancer cells. *BMC Urol*. 8:5. doi:10.1186/1471-2490-8-5.
- Tattikota SG, Cho B, Liu Y, Hu Y, Barrera V, et al. 2020. A single-cell survey of *Drosophila* blood. *Elife*. 9:e54818. doi:10.7554/eLife.54818.
- Troha K, Im JH, Revah J, Lazzaro BP, Buchon N. 2018. Comparative transcriptomics reveals CrebA as a novel regulator of infection tolerance in *D. melanogaster*. *PLoS Pathog*. 14:e1006847. doi:10.1371/journal.ppat.1006847.
- Tzou P, Reichhart J-M, Lemaitre B. 2002. Constitutive expression of a single antimicrobial peptide can restore wild-type resistance to infection in immunodeficient *Drosophila* mutants. *Proc Natl Acad Sci USA*. 99:2152–2157. doi:10.1073/pnas.042411999.
- Unckless RL, Howick VM, Lazzaro BP. 2016. Convergent balancing selection on an antimicrobial peptide in *Drosophila*. *Curr Biol*. 26:257–262. doi:10.1016/j.cub.2015.11.063.
- Uttenweiler-Joseph S, Moniatte M, Lagueux M, Dorsselaer AV, Hoffmann JA, et al. 1998. Differential display of peptides induced during the immune response of *Drosophila*: a matrix-assisted laser desorption ionization time-of-flight mass spectrometry study. *Proc Natl Acad Sci USA*. 95:11342–11347. doi:10.1073/pnas.95.19.11342.
- Yan H, Hancock REW. 2001. Synergistic interactions between mammalian antimicrobial defense peptides. *Antimicrob Agents Chemother*. 45:1558–1560. doi:10.1128/AAC.45.5.1558-1560.2001.
- Zdybicka-Barabas A, Mak P, Klys A, Skrzypiec K, Mendyk E, et al. 2012. Synergistic action of *Galleria mellonella* anionic peptide 2 and lysozyme against Gram-negative bacteria. *Biochim Biophys Acta*. 1818:2623–2635. doi:10.1016/j.bbamem.2012.06.008.
- Zhang Y, Zhao J, Fang W, Zhang J, Luo Z, et al. 2009. Mitogen-activated protein kinase *hog1* in the entomopathogenic fungus *Beauveria bassiana* regulates environmental stress responses and virulence to insects. *Applied and environmental microbiology*. 75:3787–3795. doi:10.1128/AEM.01913-08.19363067.

Communicating editor: D. Andrew
